# Supplementary material
Source: MDPI journal article supplement (https://www.mdpi.com/2504-477X/7/10/435)
Supplement: s1 [file s1]

# Enhancing stiffness, toughness and creep in a 3D printed bio-based photopolymer using ultra-low contents of nanofibrillated cellulose

Anda Barkane <sup>1,\*</sup>, Maksims Jurinovs <sup>2</sup>, Olesja Starkova <sup>3</sup>, Liga Grase <sup>4</sup>, Daniel F. Schmidt <sup>5</sup>, and Sergejs Gaidukovs <sup>6,\*</sup>

<sup>1</sup> Institute of Polymer Materials, Faculty of Materials Science and Applied Chemistry, Riga Technical University, P. Valdena 3/7, Riga LV-1048, Latvia

<sup>2</sup> Institute of Polymer Materials, Faculty of Materials Science and Applied Chemistry, Riga Technical University, P. Valdena 3/7, Riga LV-1048, Latvia

<sup>3</sup> Institute for Mechanics of Materials, University of Latvia, Jelgavas 3, LV-1004 Riga, Latvia

<sup>4</sup> Institute of Materials and Surface Engineering, Faculty of Materials Science and Applied Chemistry, P.Valdena 3/7, LV-1048, Riga, Latvia

<sup>5</sup> Department of Materials Research and Technology (MRT), Luxembourg Institute of Science and Technology (LIST), 5 Avenue des Hauts-Fourneaux, L-4362 Esch-sur-Alzette, Luxembourg

<sup>6</sup> Institute of Polymer Materials, Faculty of Materials Science and Applied Chemistry, Riga Technical University, P. Valdena 3/7, Riga LV-1048, Latvia

\* Correspondence: AB Anda.Barkane@rtu.lv and SG Sergejs.Gaidukovs@rtu.lv

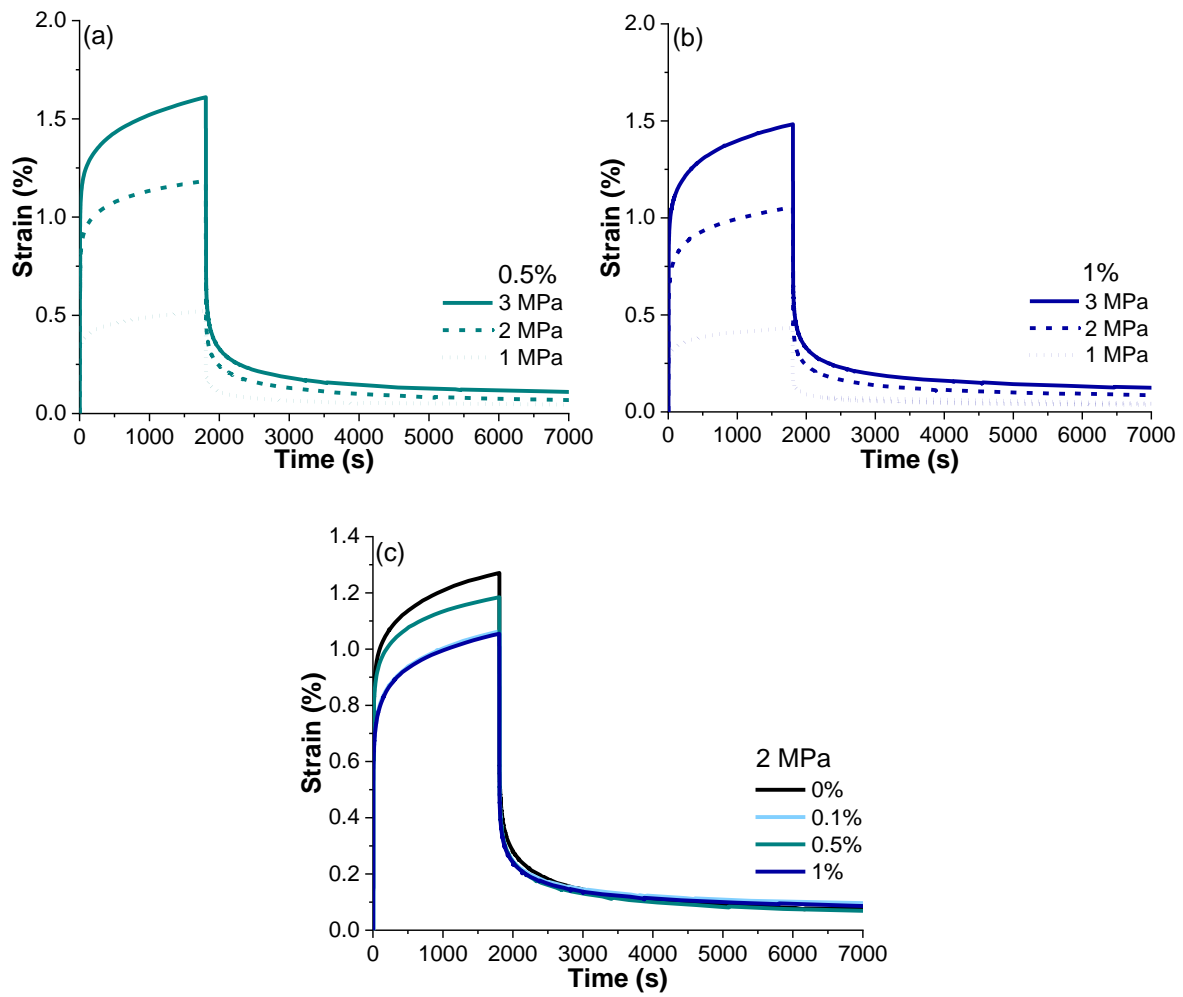

Figure S.1. Creep-recovery curves of NFC reinforced composite samples: 0.5% (a) and 1% (b) under various creep stresses, and all composites under 2 MPa (c)
